# Supplementary material for: Multi-scale inference of genetic trait architecture using biologically annotated neural networks
Source: PLOS journal article supplement (doi:10.1371/journal.pgen.1009754), 2021-08-19
Supplement: S12 (10.1371/journal.pgen.1009754.s012) [file journal.pgen.1009754.s012]

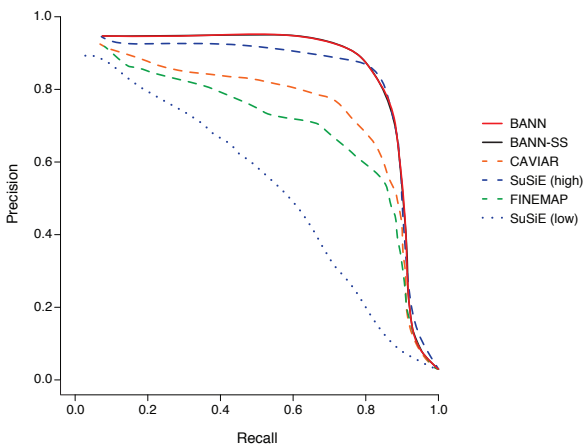

(A) SNP Methods (Sparse Traits)

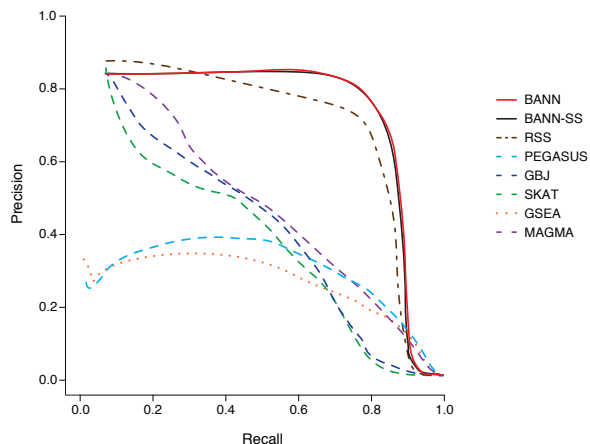

(B) SNP-Set Methods (Sparse Traits)

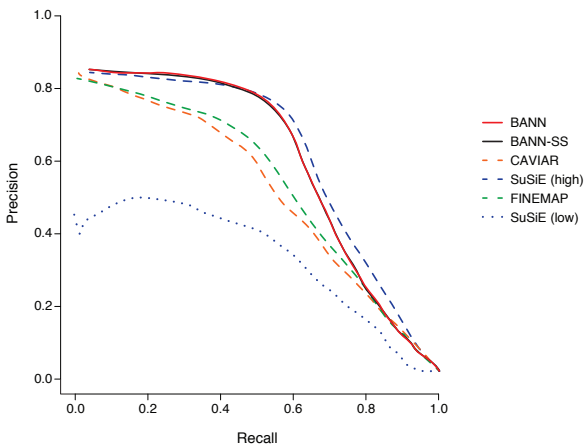

(C) SNP Methods (Polygenic Traits)

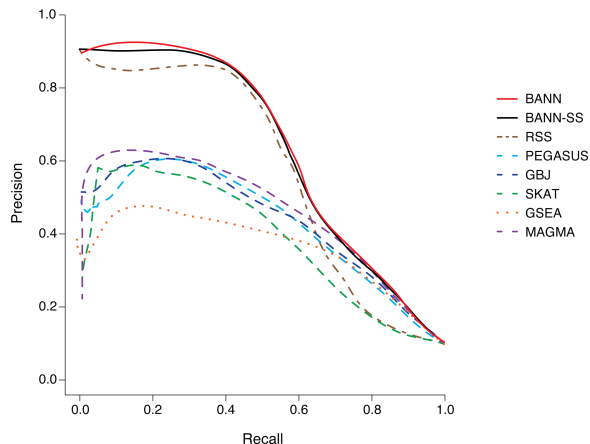

(D) SNP-Set Methods (Polygenic Traits)
